# Supplementary material for: Erythropoietin Interacts with Specific S100 Proteins
Source: MDPI journal article supplement (doi:10.3390/biom12010120), 2022-01-12
Supplement: s1 [file s1]

# Supplementary Materials

## Erythropoietin interacts with specific S100 proteins

*Alexey S. Kazakov<sup>1</sup>, Evgenia I. Deryusheva<sup>1</sup>, Andrey S. Sokolov<sup>1</sup>, Maria E. Permyakova<sup>1</sup>, Ekaterina A. Litus<sup>1</sup>, Victoria A. Rastrygina<sup>1</sup>, Vladimir N. Uversky<sup>2</sup>, Eugene A. Permyakov<sup>1,\*</sup>, and Sergei E. Permyakov<sup>1</sup>*

<sup>1</sup> Institute for Biological Instrumentation, Pushchino Scientific Center for Biological Research of the Russian Academy of Sciences, Pushchino, Moscow region, 142290 Russia

<sup>2</sup> Department of Molecular Medicine and Byrd Alzheimer's Research Institute, Morsani College of Medicine, University of South Florida, Tampa, FL, USA

**\*CORRESPONDING AUTHOR:** Dr. Eugene A. Permyakov, Institute for Biological Instrumentation, Pushchino Scientific Center for Biological Research of the Russian Academy of Sciences, Institutskaya str., 7, Pushchino, Moscow region, 142290 Russia; Email: epermyak@yandex.ru; Tel: +7 (495) 143-7741; Fax: +7(4967) 33 05 22

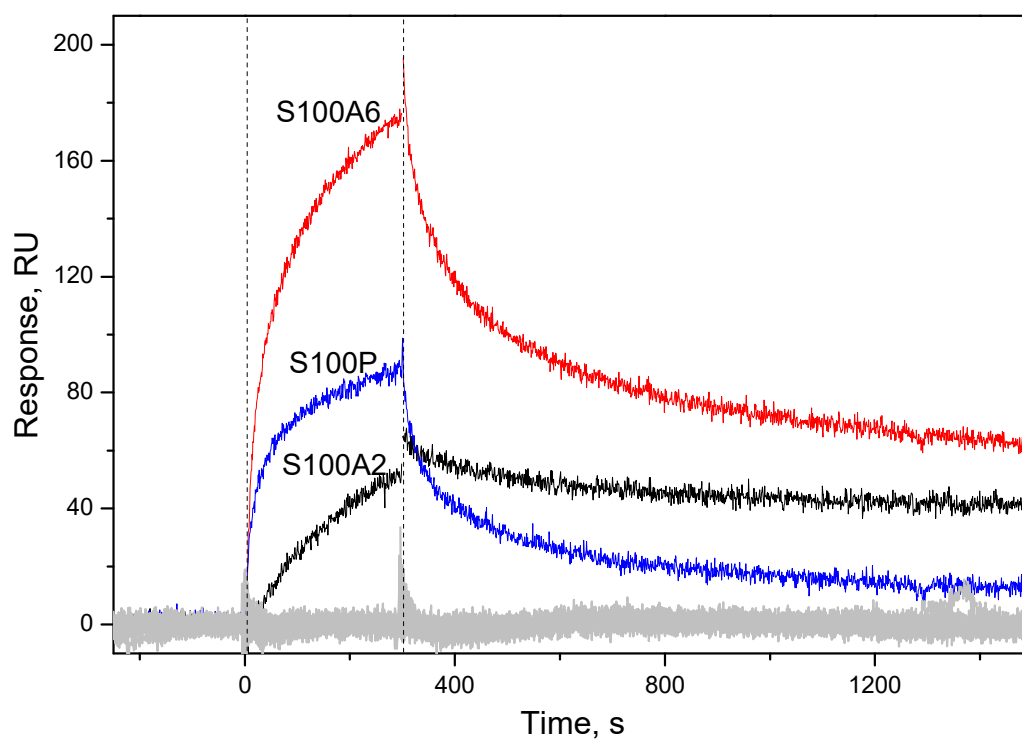

**Figure S1.** Kinetics of the interaction between EPO and  $\text{Ca}^{2+}$ -loaded S100 proteins at 25°C (pH 7.4, 1 mM  $\text{CaCl}_2$ ), followed by SPR spectroscopy using EPO as a ligand and S100 proteins/CaM (1  $\mu\text{M}$ ) as an analyte. The grey curves correspond to the data for S100A1/A3/A4/A5/A7/A8/A9/A10/A11/A12/A13/A14/A15/A16/B proteins and CaM.

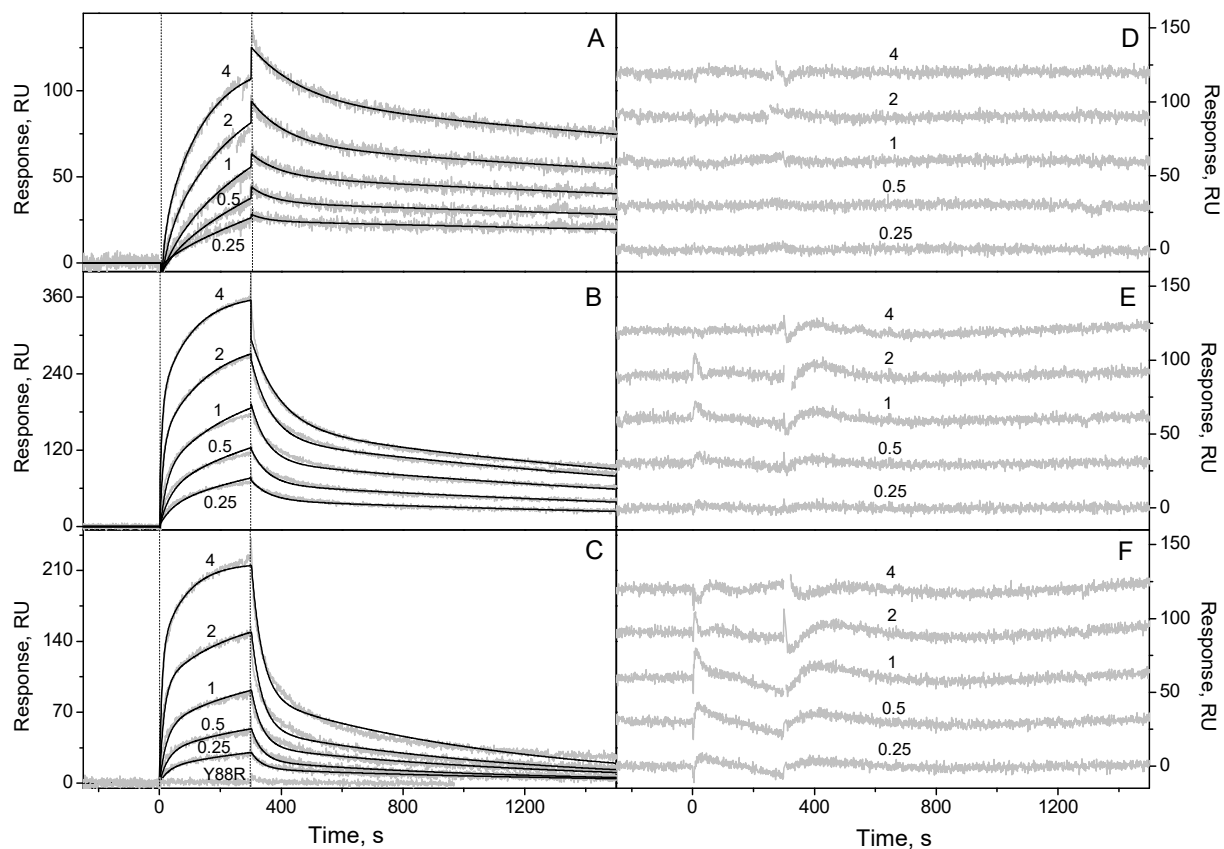

**Figure S2.** Kinetics of the interaction between EPO and  $\text{Ca}^{2+}$ -loaded S100 proteins at 25°C (pH 7.4, 1 mM  $\text{CaCl}_2$ ), followed by SPR spectroscopy using EPO as a ligand and S100A2 (panel **A**), S100A6 (**B**) or S100P (**C**) as an analyte. Molar concentrations of the analyte ( $\mu\text{M}$ ) are indicated. The SPR data for kinetics of the interaction between S100P mutant Y88R (1  $\mu\text{M}$ ) and EPO are shown in panel **C**. The grey curves are experimental, while the black curves are theoretical, calculated according to the heterogeneous ligand model (1) (see Table 1). The panels **D**, **E** and **F** represent residuals of the fits for S100A2, S100A6 and S100P proteins, respectively.

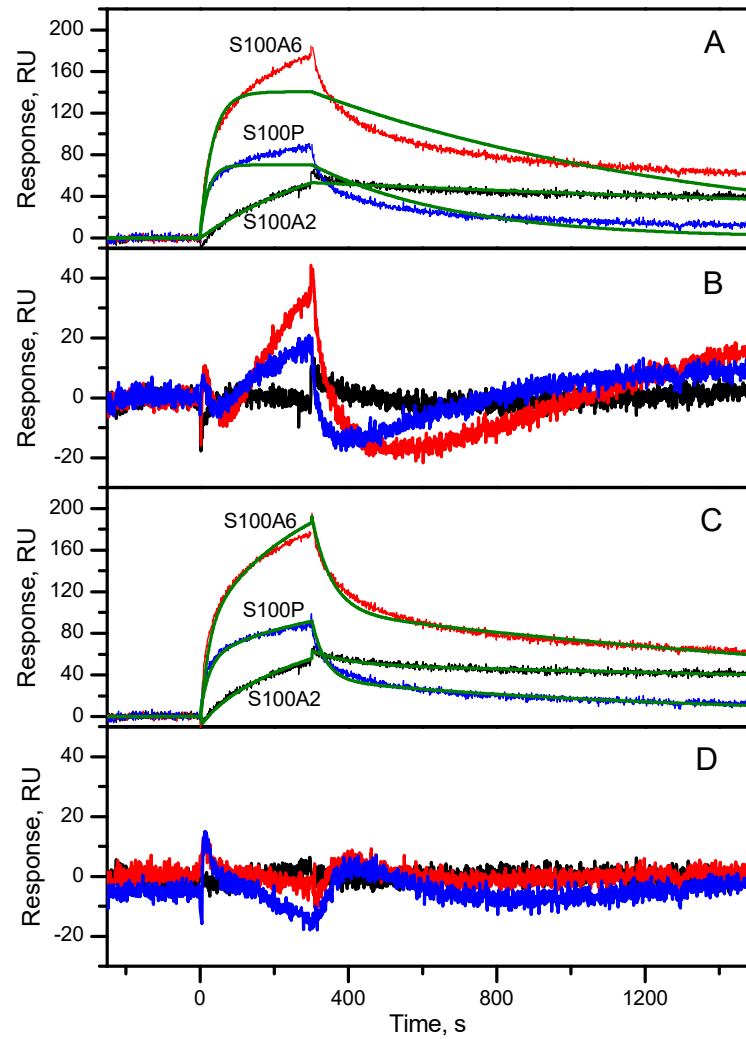

**Figure S3.** (A, C) Kinetics of the interaction between EPO and  $\text{Ca}^{2+}$ -loaded S100 proteins at 25°C (pH 7.4, 1 mM  $\text{CaCl}_2$ ), followed by SPR spectroscopy using EPO as a ligand and S100 proteins (1  $\mu\text{M}$ ) as an analyte. The black (S100A2), red (S100A6) and blue (S100P) curves are experimental, while the green curves are theoretical, calculated according to either 1:1 binding model (A) or the heterogeneous ligand model (1) (C). (B, D) Residuals of the fits for the 1:1 and heterogeneous ligand models, respectively. The color scheme is analogous to that used in panels A and C.

**Table S1.** Molar extinction coefficients at 280 nm for the proteins used in the present study, calculated according to ref. [1].

| <i>Protein</i>                                         | $\epsilon_{280nm}, M^{-1}cm^{-1}$ |
|--------------------------------------------------------|-----------------------------------|
| EPO                                                    | 22,710                            |
| S100A1                                                 | 8,480                             |
| S100A2<br>S100A4<br>S100A10<br>S100A12<br>S100P<br>CaM | 2,980                             |
| S100A3                                                 | 14,440                            |
| S100A5<br>S100A6<br>S100A7<br>S100A11<br>S100A15       | 4,470                             |
| S100A8                                                 | 11,460                            |
| S100A9<br>S100A13<br>S100A14                           | 6,990                             |
| S100A16                                                | 12,950                            |
| S100B<br>Y88R S100P                                    | 1,490                             |

**Table S2.** List of the human diseases associated with EPO and S100A2 protein, according to DisGeNET database (<http://www.disgenet.org>). PubMed identifiers of the references confirming the protein-disease associations are indicated.

| <i>Nº</i> | <i>Disease</i>                   | <i>EPO</i>                                                                                                                       | <i>S100A2</i>                                                                                                |
|-----------|----------------------------------|----------------------------------------------------------------------------------------------------------------------------------|--------------------------------------------------------------------------------------------------------------|
| 1         | Adenocarcinoma                   | 15709164                                                                                                                         | 19238334; 17032501; 16232198; 15467767; 17032501; 27876462; 17940995; 16015609; 18656279; 16367903; 11691825 |
| 2         | Adult Ependymoma                 | 14563949                                                                                                                         | 18781180                                                                                                     |
| 3         | Breast Carcinoma                 | 21749867; 24502950; 31291309; 28247960; 20353997; 16207704; 21075308; 18084619; 29552165; 12118093; 30700319; 28418910; 24165569 | 11076656; 9481475                                                                                            |
| 4         | Carcinogenesis                   | 16627979; 27145271; 24583149; 22843933; 12759237; 15769989; 16175858; 29552165                                                   | 19725154; 11691825; 26916071; 17940995; 23337980                                                             |
| 5         | Carcinoma of lung                | 29345289                                                                                                                         | 27876462; 18656279; 11691825; 24863947; 19118029                                                             |
| 6         | Childhood Ependymoma             | 14563949                                                                                                                         | 18781180                                                                                                     |
| 7         | Cholangiocarcinoma               | 23052842                                                                                                                         | 25999659                                                                                                     |
| 8         | Ependymoma                       | 14563949                                                                                                                         | 18781180                                                                                                     |
| 9         | Head and Neck Carcinoma          | 15856028                                                                                                                         | 17123307                                                                                                     |
| 10        | Head and Neck Neoplasms          | 15671524                                                                                                                         | 17123307                                                                                                     |
| 11        | Lung Neoplasms                   | 23861852                                                                                                                         | 15467767; 17067748                                                                                           |
| 12        | Malignant Head and Neck Neoplasm | 15856028                                                                                                                         | 17123307                                                                                                     |
| 13        | Malignant neoplasm of breast     | 16207704; 18084619; 12118093; 24502950; 21075308; 30700319; 28418910; 29552165; 24165569; 20353997; 31291309; 28247960; 28352153 | 9481475                                                                                                      |
| 14        | Malignant neoplasm of lung       | 29345289                                                                                                                         | 19118029; 18656279; 11691825; 27876462; 24863947                                                             |
| 15        | Malignant neoplasm of prostate   | 19567780; 30958616; 15467711; 29917167                                                                                           | 16015609                                                                                                     |
| 16        | Malignant Neoplasms              | 10916088; 21860424; 29719440; 28415825; 19264915; 16207704; 23830978; 29485009;                                                  | 15800916; 23337980; 23996929; 11813862; 11076656                                                             |

|    |                                  |                                                                                                                                                                                                                                                                                                                                                                                                                                                                                                           |                                                                                                                                       |
|----|----------------------------------|-----------------------------------------------------------------------------------------------------------------------------------------------------------------------------------------------------------------------------------------------------------------------------------------------------------------------------------------------------------------------------------------------------------------------------------------------------------------------------------------------------------|---------------------------------------------------------------------------------------------------------------------------------------|
|    |                                  | 8608241; 22814609;<br>31322257; 22843933;<br>18620752; 15467711;<br>20353997; 28985758;<br>31704854; 28629522;<br>27145271; 30971397;<br>31596520; 12667989;<br>20383466; 18431543;<br>31830663; 20384218;<br>24059228; 15591419;<br>26412593; 28504901;<br>17656101; 31828489;<br>29157782; 17253966;<br>28247960; 15856028;<br>23881169; 30969847;<br>25331796; 31691976;<br>30483799; 19536148;<br>18781955; 11325818;<br>31846977; 28795314;<br>1653276; 17038666;<br>30622244; 11950137;<br>12419827 |                                                                                                                                       |
| 17 | Neoplasm Metastasis              | 15856028; 29181060;<br>19536148; 16699298;<br>15856028; 28331341                                                                                                                                                                                                                                                                                                                                                                                                                                          | 19725154; 25874882;<br>25999659; 15800916;<br>9291441; 23996929;<br>19118029; 16273244;<br>16015609; 17123307;<br>17123307            |
| 18 | Non-Small Cell Lung Carcinoma    | 29137269; 31752873;<br>16909043; 27494133;<br>15709164; 29345289;<br>29132013                                                                                                                                                                                                                                                                                                                                                                                                                             | 27876462; 17689067;<br>15467767; 15313892;<br>18656279; 22033466;<br>24863947; 12400018;<br>19238334; 15800916;<br>19118029; 11691825 |
| 19 | Pancreatic Ductal Adenocarcinoma | 21829709                                                                                                                                                                                                                                                                                                                                                                                                                                                                                                  | 30570546                                                                                                                              |
| 20 | Periodontitis                    | 29207066                                                                                                                                                                                                                                                                                                                                                                                                                                                                                                  | 21922197                                                                                                                              |
| 21 | Primary malignant neoplasm       | 22814609; 18781955;<br>30622244; 31704854;<br>30483799; 31322257;<br>28795314; 15856028;<br>19536148; 25331796;<br>26412593; 30969847;<br>31596520; 18620752;<br>16207704; 15467711;<br>19264915; 28629522;<br>22843933; 21860424;<br>29719440; 28247960;<br>17656101; 28415825;<br>29157782; 28504901;                                                                                                                                                                                                   | 15800916; 23996929;<br>11813862; 23337980                                                                                             |

|    |                                                 |                                                                                                                                                                           |                                                                                         |
|----|-------------------------------------------------|---------------------------------------------------------------------------------------------------------------------------------------------------------------------------|-----------------------------------------------------------------------------------------|
|    |                                                 | 29485009; 23881169;<br>17038666; 30971397;<br>11325818; 20353997;<br>12667989; 31828489;<br>31830663; 27145271;<br>15591419; 24059228;<br>31846977; 20383466;<br>23830978 |                                                                                         |
| 22 | Prostate carcinoma                              | 30958616; 29917167;<br>15467711; 19567780                                                                                                                                 | 16015609                                                                                |
| 23 | Recurrent tumor                                 | 28587437                                                                                                                                                                  | 22833293                                                                                |
| 24 | Secondary malignant<br>neoplasm of lymph node   | 30854109; 17647284;<br>29181060; 15856028                                                                                                                                 | 19376121; 17123307;<br>27876462; 24318973                                               |
| 25 | Squamous cell carcinoma                         | 25182342; 15709164;<br>15967106; 16278379                                                                                                                                 | 18656279; 19238334;<br>16908593; 11304580;<br>17123307; 29453969;<br>21897749; 11956617 |
| 26 | Squamous cell carcinoma of<br>the head and neck | 25182342; 15856028                                                                                                                                                        | 17123307; 11304580                                                                      |
| 27 | Stomach Carcinoma                               | 30045276                                                                                                                                                                  | 24318973; 23337980;<br>12460893                                                         |
| 28 | Tumor Cell Invasion                             | 20064603; 28247960;<br>22843933; 28629521;<br>25175278; 28795314;<br>15856028; 23028796;<br>24100272                                                                      | 16908593; 23996929;<br>16367903; 22747445;<br>25999659; 23337980;<br>24318973           |
| 29 | Tumor Progression                               | 23028796; 23305401;<br>19886790; 28415825;<br>26481148; 29491103;<br>26412593; 18781955;<br>24497137; 12759237;<br>17922127; 26575329;<br>19544471; 17429338;<br>28629521 | 22747445; 16367903;<br>17940995                                                         |
| 30 | Tumor Promotion                                 | 28703764                                                                                                                                                                  | 23996929                                                                                |



**Table S3.** List of the human diseases associated with EPO and S100A2 protein, according to Open Targets Platform database (<https://www.opentargets.org>), and corresponding association scores (<https://docs.targetvalidation.org/getting-started/scoring>).

| <i>Nº</i> | <i>Disease</i>                        | <i>EPO</i> | <i>S100A2</i> |
|-----------|---------------------------------------|------------|---------------|
| 1         | acne                                  | 0.002      | 0.008         |
| 2         | acrokeratoelastoidosis of Costa       | 0.004      | 0.002         |
| 3         | adenocarcinoma                        | 0.008      | 0.012         |
| 4         | adenoma                               | 0.001      | 0.003         |
| 5         | Alzheimer's disease                   | 0.097      | 0.010         |
| 6         | asthma                                | 0.019      | 0.008         |
| 7         | Barrett's esophagus                   | 0.003      | 0.002         |
| 8         | benign prostatic hyperplasia          | 0.002      | 0.027         |
| 9         | bladder carcinoma                     | 0.012      | 0.069         |
| 10        | breast cancer                         | 0.023      | 0.006         |
| 11        | breast carcinoma                      | 0.042      | 0.004         |
| 12        | bronchopulmonary dysplasia            | 0.102      | 0.002         |
| 13        | cancer                                | 0.084      | 0.048         |
| 14        | carcinoma                             | 0.011      | 0.009         |
| 15        | cervical carcinoma                    | 0.012      | 0.002         |
| 16        | cholangiocarcinoma                    | 0.058      | 0.069         |
| 17        | chromophobe renal cell carcinoma      | 0.002      | 0.012         |
| 18        | clear cell renal carcinoma            | 0.001      | 0.039         |
| 19        | colorectal adenocarcinoma             | 0.007      | 0.035         |
| 20        | colorectal cancer                     | 0.010      | 0.029         |
| 21        | Crohn's disease                       | 0.011      | 0.006         |
| 22        | diabetes mellitus                     | 0.094      | 0.002         |
| 23        | familial adenomatous polyposis        | 0.011      | 0.004         |
| 24        | gastric adenocarcinoma                | 0.013      | 0.015         |
| 25        | gastric carcinoma                     | 0.010      | 0.023         |
| 26        | glioblastoma multiforme               | 0.026      | 0.012         |
| 27        | head and neck squamous cell carcinoma | 0.191      | 0.024         |
| 28        | hepatocellular carcinoma              | 0.090      | 0.004         |
| 29        | idiopathic pulmonary fibrosis         | 0.007      | 0.002         |
| 30        | immature platelet fraction            | 0.003      | 0.001         |
| 31        | in situ carcinoma                     | 0.009      | 0.011         |
| 32        | infection                             | 0.092      | 0.003         |
| 33        | invasive breast carcinoma             | 0.039      | 0.002         |
| 34        | kidney neoplasm                       | 0.026      | 0.004         |
| 35        | laryngeal carcinoma                   | 0.004      | 0.043         |
| 36        | laryngeal squamous cell carcinoma     | 0.002      | 0.008         |
| 37        | lung adenocarcinoma                   | 0.009      | 0.017         |
| 38        | lung carcinoma                        | 0.008      | 0.002         |
| 39        | lymph node metastatic carcinoma       | 0.007      | 0.003         |
| 40        | medulloblastoma                       | 0.004      | 0.043         |

|    |                                   |       |       |
|----|-----------------------------------|-------|-------|
| 41 | melanoma                          | 0.088 | 0.030 |
| 42 | metastatic malignant neoplasm     | 0.004 | 0.002 |
| 43 | neoplasm                          | 0.112 | 0.061 |
| 44 | non-small cell lung carcinoma     | 0.093 | 0.105 |
| 45 | nonpapillary renal cell carcinoma | 0.040 | 0.008 |
| 46 | oral squamous cell carcinoma      | 0.001 | 0.004 |
| 47 | osteosarcoma                      | 0.052 | 0.003 |
| 48 | ovarian carcinoma                 | 0.013 | 0.009 |
| 49 | pancreatic adenocarcinoma         | 0.017 | 0.008 |
| 50 | pancreatic ductal adenocarcinoma  | 0.004 | 0.010 |
| 51 | papillary renal cell carcinoma    | 0.012 | 0.009 |
| 52 | periodontal disease               | 0.005 | 0.006 |
| 53 | periodontitis                     | 0.035 | 0.032 |
| 54 | pes                               | 0.039 | 0.002 |
| 55 | platelet crit                     | 0.033 | 0.023 |
| 56 | psoriasis                         | 0.001 | 0.029 |
| 57 | pulmonary fibrosis                | 0.003 | 0.009 |
| 58 | renal cell carcinoma              | 0.106 | 0.036 |
| 59 | restless legs syndrome            | 0.007 | 0.004 |
| 60 | sepsis                            | 0.065 | 0.005 |
| 61 | skin neoplasm                     | 0.007 | 0.004 |
| 62 | small cell carcinoma              | 0.002 | 0.004 |
| 63 | squamous cell carcinoma           | 0.013 | 0.020 |
| 64 | ulcerative colitis                | 0.013 | 0.009 |
| 65 | Ulnar-mammary syndrome            | 0.001 | 0.001 |

**Table S4.** List of the human diseases associated with EPO and S100A6 protein, according to DisGeNET database (<http://www.disgenet.org>). PubMed identifiers of the references confirming the protein-disease associations are indicated.

| <i>Nº</i> | <i>Disease</i>                | <i>EPO</i>                                                                                                                                           | <i>S100A6</i>                                                                                                                            |
|-----------|-------------------------------|------------------------------------------------------------------------------------------------------------------------------------------------------|------------------------------------------------------------------------------------------------------------------------------------------|
| 1         | Acute myocardial infarction   | 22777420; 29752300; 28109258; 17896976; 31389586                                                                                                     | 28174168                                                                                                                                 |
| 2         | Adenocarcinoma                | 15709164                                                                                                                                             | 12239456; 12239456; 10952782                                                                                                             |
| 3         | Adult ependymoma              | 14563949                                                                                                                                             | 18781180                                                                                                                                 |
| 4         | Alzheimer's disease           | 31763432; 28397428; 23662159; 31382012; 29743517; 27662300; 31453787; 31484803; 31199881; 30252487; 31493483; 31255922; 31660425; 22388478; 30656553 | 31440382; 15590066                                                                                                                       |
| 5         | Amyloidosis                   | 18925459; 22388478                                                                                                                                   | 31440382                                                                                                                                 |
| 6         | Amyotrophic lateral sclerosis | 17439481; 17174305; 24820540; 17888545; 17142042; 30175978                                                                                           | 11108968; 12152788; 15590066                                                                                                             |
| 7         | B-cell lymphomas              | 28273832; 24394348                                                                                                                                   | 28123545                                                                                                                                 |
| 8         | Breast carcinoma              | 24502950; 31291309; 28247960; 20353997; 16207704; 21075308; 18084619; 29552165; 12118093; 30700319; 28418910; 24165569                               | 11267940; 25363551; 25454514; 28051137; 21459801; 22997041; 2448309; 11477119; 23029355; 9716033; 10517668; 23485561; 31809870; 26474308 |
| 9         | Carcinogenesis                | 16627979; 27145271; 24583149; 22843933; 12759237; 15769989; 16175858; 29552165                                                                       | 15280928; 22295074; 28343163; 25760073; 22560296; 19891957; 20629554; 17970874; 25120023; 16340196                                       |
| 10        | Carcinoma of lung             | 29345289                                                                                                                                             | 31497188; 16340196                                                                                                                       |
| 11        | Central neuroblastoma         | 31245372; 16500719; 12902921; 17045782; 12239177; 10087335; 15352172; 16407271                                                                       | 1998963; 7576953                                                                                                                         |
| 12        | Childhood ependymoma          | 14563949                                                                                                                                             | 18781180                                                                                                                                 |
| 13        | Childhood neuroblastoma       | 16500719; 12902921; 17045782; 15352172; 12239177; 31245372; 16407271; 10087335                                                                       | 17579622; 1998963; 7576953; 19216736                                                                                                     |
| 14        | Colon carcinoma               | 27903235; 29160911                                                                                                                                   | 29534068                                                                                                                                 |

|    |                                                |                                                                                                                                                                                         |                                                                                                             |
|----|------------------------------------------------|-----------------------------------------------------------------------------------------------------------------------------------------------------------------------------------------|-------------------------------------------------------------------------------------------------------------|
| 15 | Conventional (clear cell) renal cell carcinoma | 15709172; 11986208; 19407488; 17640059; 17696210; 23305401; 21042786; 10916088; 16627979; 27468719; 28233444                                                                            | 25120023; 25760073                                                                                          |
| 16 | Coronary arteriosclerosis                      | 28885393; 31778269; 31707794; 28315563; 25245553; 31741439; 17998053                                                                                                                    | 28174168                                                                                                    |
| 17 | Endometriosis                                  | 31262977; 12525458                                                                                                                                                                      | 26044826; 28075439; 29544367                                                                                |
| 18 | Ependymoma                                     | 14563949                                                                                                                                                                                | 18781180                                                                                                    |
| 19 | Glioblastoma                                   | 23070117; 30871240; 28629521; 17524506; 21749867; 9787178; 26178805; 24467192                                                                                                           | 19074870                                                                                                    |
| 20 | Glioblastoma multiforme                        | 24467192; 24379112; 21749867; 23070117; 26178805; 17524506; 28629521                                                                                                                    | 19074870                                                                                                    |
| 21 | Hepatoblastoma                                 | 30214643; 16175858; 9787178; 17218907                                                                                                                                                   | 12859951                                                                                                    |
| 22 | Liver carcinoma                                | 8387202; 28587437; 12239177; 11408933; 1653242; 11592940; 24841514; 28739744; 11025195; 27827952; 9126339; 28743805; 23830978; 11090055; 8626614; 30723742; 24491563; 30367150; 2825172 | 24281831; 19048101                                                                                          |
| 23 | Liver regeneration disorder                    | 31401982                                                                                                                                                                                | 12859951                                                                                                    |
| 24 | Lung neoplasms                                 | 23861852                                                                                                                                                                                | 12859967                                                                                                    |
| 25 | Malignant neoplasm of breast                   | 16207704; 18084619; 12118093; 24502950; 21075308; 30700319; 28418910; 29552165; 24165569; 20353997; 31291309; 28247960; 28352153                                                        | 25454514; 11267940; 21459801; 23029355; 28051137; 22997041; 10517668; 25363551; 2448309; 26474308; 25917868 |
| 26 | Malignant neoplasm of lung                     | 29345289                                                                                                                                                                                | 18620780                                                                                                    |

|    |                                  |                                                                                                                                                                                                                                                                                             |                                                                                                                             |
|----|----------------------------------|---------------------------------------------------------------------------------------------------------------------------------------------------------------------------------------------------------------------------------------------------------------------------------------------|-----------------------------------------------------------------------------------------------------------------------------|
| 27 | Malignant neoplasms              | 29719440; 28415825;<br>19264915; 16207704;<br>23830978; 29485009;<br>8608241; 22814609;<br>31322257; 22843933;<br>18620752; 15467711;<br>20353997; 28985758;<br>31704854; 28629522;<br>27145271; 30971397;<br>31596520; 12667989;<br>20383466; 18431543;<br>31830663                        | 25120023; 29544367;<br>29552203; 19888321;<br>28123545; 18714402;<br>17970874; 15280928                                     |
| 28 | Malignant squamous cell neoplasm | 25182342                                                                                                                                                                                                                                                                                    | 29053662                                                                                                                    |
| 29 | Malignant tumor of colon         | 29160911;<br>27903235                                                                                                                                                                                                                                                                       | 29053662                                                                                                                    |
| 30 | Melanoma                         | 15743794; 21860424;<br>19536148                                                                                                                                                                                                                                                             | 7654229; 9291441;<br>1737392; 28433799;<br>9925766; 8261423                                                                 |
| 31 | Myocardial ischemia              | 31778269; 31741439;<br>28885393                                                                                                                                                                                                                                                             | 28174168                                                                                                                    |
| 32 | Neoplasm metastasis              | 29181060; 19536148;<br>16699298; 15856028;<br>28331341                                                                                                                                                                                                                                      | 22681645; 25120023;<br>10952782; 12239456;<br>26252518; 16015609;<br>24705642; 18612712;<br>20581057; 23007696;<br>16157226 |
| 33 | Neoplasms                        | 19536148; 19544471;<br>29707043; 12902921;<br>15709172; 29345289;<br>26481148; 7982467;<br>18781955; 24467192;<br>19886790; 17429338;<br>21042786; 28871174;<br>11328280; 17992257;<br>30214643; 25182342;<br>30554729; 24059228;<br>17610479; 28418910;<br>19264915; 28714517;<br>30644531 | 22681645; 25120023;<br>10952782; 12239456;<br>26252518; 16015609;<br>24705642; 18612712;<br>20581057; 23007696;<br>16157226 |
| 34 | Non-small cell lung carcinoma    | 31752873; 16909043;<br>27494133; 15709164;<br>29345289; 29132013;<br>30745811                                                                                                                                                                                                               | 18620780                                                                                                                    |
| 35 | Ovarian neoplasm                 | 17893874; 17893875                                                                                                                                                                                                                                                                          | 19888321                                                                                                                    |
| 36 | Primary malignant neoplasm       | 31704854; 30483799;<br>31322257; 28795314;<br>15856028; 19536148;<br>25331796; 26412593;                                                                                                                                                                                                    | 19888321; 28123545;<br>29552203; 17970874                                                                                   |

|    |                                       |                                                                                                                                                    |                                                        |
|----|---------------------------------------|----------------------------------------------------------------------------------------------------------------------------------------------------|--------------------------------------------------------|
|    |                                       | 30969847; 31596520;<br>18620752;16207704                                                                                                           |                                                        |
| 37 | Primary malignant<br>neoplasm of lung | 29345289                                                                                                                                           | 31497188; 18620780                                     |
| 38 | Prostate carcinoma                    | 30958616; 29917167;<br>15467711                                                                                                                    | 15280928                                               |
| 39 | Squamous cell<br>carcinoma            | 25182342; 15709164;<br>15967106; 16278379                                                                                                          | 17495951; 18201235;<br>29053662; 20596636;<br>18705642 |
| 40 | Thyroid neoplasm                      | 16699298                                                                                                                                           | 20629554                                               |
| 41 | Tumor cell invasion                   | 28247960; 22843933;<br>28629521; 25175278;<br>28795314; 15856028;<br>23028796; 24100272                                                            | 24705642; 10952782;<br>29544367; 29629840              |
| 42 | Tumor progression                     | 23305401; 19886790;<br>28415825; 26481148;<br>29491103; 26412593;<br>18781955; 24497137;<br>12759237; 17922127;<br>26575329; 19544471;<br>17429338 | 22681645                                               |

**Table S5.** List of the human diseases associated with EPO and S100A6 protein, according to Open Targets Platform database (<https://www.opentargets.org>), and corresponding association scores (<https://docs.targetvalidation.org/getting-started/scoring>). Diseases with association scores for the both proteins exceeding 0.1 are highlighted in yellow.

| <i>Nº</i> | <i>Disease</i>                               | <i>EPO</i> | <i>S100A6</i> |
|-----------|----------------------------------------------|------------|---------------|
| 1         | acanthosis nigricans                         | 0.013      | 0.006         |
| 2         | acrokeratoelastoidosis of Costa              | 0.004      | 0.002         |
| 3         | acute coronary syndrome                      | 0.015      | 0.009         |
| 4         | acute hepatic failure                        | 0.001      | 0.028         |
| 5         | acute kidney injury                          | 0.029      | 0.011         |
| 6         | acute lymphoblastic leukemia                 | 0.021      | 0.066         |
| 7         | acute myocardial infarction                  | 0.023      | 0.013         |
| 8         | adenocarcinoma                               | 0.008      | 0.023         |
| 9         | adenoma                                      | 0.001      | 0.031         |
| 10        | adrenal cortex carcinoma                     | 0.018      | 0.025         |
| 11        | adrenal gland pheochromocytoma               | 0.023      | 0.002         |
| 12        | adrenocortical adenoma                       | 0.001      | 0.001         |
| 13        | alpers syndrome                              | 0.005      | 0.003         |
| 14        | Alzheimer's disease                          | 0.097      | 0.005         |
| 15        | amyotrophic lateral sclerosis                | 0.048      | 0.014         |
| 16        | angina pectoris                              | 0.009      | 0.002         |
| 17        | anxiety                                      | 0.012      | 0.001         |
| 18        | atrial fibrillation                          | 0.021      | 0.003         |
| 19        | atrophy                                      | 0.026      | 0.001         |
| 20        | autoimmune disease                           | 0.025      | 0.002         |
| 21        | autonomic neuropathy                         | 0.018      | 0.001         |
| 22        | autosomal dominant polycystic kidney disease | 0.084      | 0.002         |
| 23        | axial length measurement                     | 0.034      | 0.026         |
| 24        | bacterial disease                            | 0.017      | 0.002         |
| 25        | Bartsocas-Papas syndrome                     | 0.007      | 0.002         |
| 26        | Bartter syndrome                             | 0.008      | 0.004         |
| 27        | benign prostatic hyperplasia                 | 0.002      | 0.005         |
| 28        | bladder carcinoma                            | 0.012      | 0.009         |
| 29        | brain injury                                 | 0.038      | 0.001         |
| 30        | breast cancer                                | 0.023      | 0.044         |
| 31        | breast carcinoma                             | 0.042      | 0.008         |
| 32        | calf circumference measurement               | 0.040      | 0.009         |
| 33        | cancer                                       | 0.084      | 0.043         |
| 34        | carcinoma                                    | 0.011      | 0.017         |
| 35        | cardiac hypertrophy                          | 0.016      | 0.016         |
| 36        | cardiomyopathy                               | 0.015      | 0.001         |
| 37        | cardiovascular disease                       | 0.039      | 0.004         |
| 38        | cervical carcinoma                           | 0.012      | 0.002         |
| 39        | cholangiocarcinoma                           | 0.058      | 0.081         |
| 40        | cholesteryl ester measurement                | 0.007      | 0.013         |
| 41        | chromosomal aberration frequency             | 0.012      | 0.001         |
| 42        | chronic kidney disease                       | 0.116      | 0.005         |
| 43        | chronic obstructive pulmonary disease        | 0.035      | 0.007         |

|    |                                |       |       |
|----|--------------------------------|-------|-------|
| 44 | cirrhosis of liver             | 0.045 | 0.004 |
| 45 | clear cell adenocarcinoma      | 0.004 | 0.004 |
| 46 | clear cell renal carcinoma     | 0.001 | 0.022 |
| 47 | cognitive disorder             | 0.002 | 0.001 |
| 48 | colon carcinoma                | 0.037 | 0.003 |
| 49 | colorectal adenocarcinoma      | 0.007 | 0.042 |
| 50 | colorectal carcinoma           | 0.002 | 0.050 |
| 51 | congenital adrenal hyperplasia | 0.008 | 0.003 |
| 52 | congenital heart disease       | 0.014 | 0.001 |
| 53 | congestive heart failure       | 0.087 | 0.004 |
| 54 | coronary artery disease        | 0.040 | 0.001 |
| 55 | Cushing syndrome               | 0.001 | 0.002 |
| 56 | cyst                           | 0.048 | 0.004 |
| 57 | decubitus ulcer                | 0.004 | 0.007 |
| 58 | diabetes mellitus              | 0.094 | 0.006 |
| 59 | dilated cardiomyopathy         | 0.018 | 0.002 |
| 60 | Down syndrome                  | 0.021 | 0.001 |
| 61 | dry eye syndrome               | 0.007 | 0.002 |
| 62 | Duchenne muscular dystrophy    | 0.004 | 0.012 |
| 63 | endometrial carcinoma          | 0.018 | 0.012 |
| 64 | endometriosis                  | 0.058 | 0.055 |
| 65 | endometritis                   | 0.007 | 0.002 |
| 66 | fetal growth restriction       | 0.020 | 0.004 |
| 67 | fibroma                        | 0.004 | 0.002 |
| 68 | Friedreich ataxia              | 0.025 | 0.001 |
| 69 | gastric adenocarcinoma         | 0.013 | 0.003 |
| 70 | gastric carcinoma              | 0.010 | 0.013 |
| 71 | gastroenteritis                | 0.004 | 0.002 |
| 72 | gastrointestinal stromal tumor | 0.051 | 0.001 |
| 73 | glaucoma                       | 0.059 | 0.003 |
| 74 | glioblastoma multiforme        | 0.026 | 0.016 |
| 75 | heart disease                  | 0.010 | 0.004 |
| 76 | heart failure                  | 0.024 | 0.004 |
| 77 | hematocrit                     | 0.326 | 0.002 |
| 78 | hepatocellular carcinoma       | 0.090 | 0.054 |
| 79 | hyperglycemia                  | 0.082 | 0.006 |
| 80 | hypertension                   | 0.043 | 0.011 |
| 81 | hypothyroidism                 | 0.030 | 0.011 |
| 82 | immature platelet fraction     | 0.003 | 0.004 |
| 83 | infection                      | 0.092 | 0.029 |
| 84 | infertility                    | 0.004 | 0.008 |
| 85 | inflammatory bowel disease     | 0.037 | 0.001 |
| 86 | influenza                      | 0.011 | 0.001 |
| 87 | intermediate coronary syndrome | 0.002 | 0.007 |
| 88 | invasive breast carcinoma      | 0.039 | 0.003 |
| 89 | kidney disease                 | 0.027 | 0.007 |
| 90 | leiomyoma                      | 0.032 | 0.010 |
| 91 | leiomyosarcoma                 | 0.018 | 0.001 |
| 92 | leprosy                        | 0.007 | 0.009 |



|     |                                   |       |       |
|-----|-----------------------------------|-------|-------|
| 93  | lung adenocarcinoma               | 0.009 | 0.008 |
| 94  | lung carcinoma                    | 0.008 | 0.004 |
| 95  | lupus nephritis                   | 0.010 | 0.002 |
| 96  | lymph node metastatic carcinoma   | 0.007 | 0.012 |
| 97  | malignant hypertension            | 0.012 | 0.004 |
| 98  | meconium aspiration syndrome      | 0.007 | 0.002 |
| 99  | medulloblastoma                   | 0.004 | 0.024 |
| 100 | melanoma                          | 0.088 | 0.040 |
| 101 | meningioma                        | 0.011 | 0.016 |
| 102 | meningococcal infection           | 0.004 | 0.002 |
| 103 | mental deterioration              | 0.009 | 0.004 |
| 104 | mesothelioma                      | 0.003 | 0.004 |
| 105 | metastatic malignant neoplasm     | 0.004 | 0.002 |
| 106 | metastatic neoplasm               | 0.006 | 0.001 |
| 107 | Miyoshi myopathy                  | 0.084 | 0.025 |
| 108 | monocytic leukemia                | 0.002 | 0.002 |
| 109 | mucinous carcinoma                | 0.002 | 0.002 |
| 110 | multiple myeloma                  | 0.088 | 0.009 |
| 111 | muscular dystrophy                | 0.003 | 0.001 |
| 112 | myocardial infarction             | 0.035 | 0.011 |
| 113 | myocardial ischemia               | 0.018 | 0.007 |
| 114 | neoplasm                          | 0.112 | 0.109 |
| 115 | nephrotic syndrome                | 0.024 | 0.001 |
| 116 | nervous system disease            | 0.025 | 0.008 |
| 117 | neuroblastoma                     | 0.034 | 0.020 |
| 118 | non-alcoholic steatohepatitis     | 0.001 | 0.002 |
| 119 | non-Hodgkins lymphoma             | 0.013 | 0.004 |
| 120 | non-small cell lung carcinoma     | 0.093 | 0.031 |
| 121 | nonpapillary renal cell carcinoma | 0.040 | 0.079 |
| 122 | obesity                           | 0.087 | 0.004 |
| 123 | obstructive sleep apnea           | 0.062 | 0.004 |
| 124 | oral squamous cell carcinoma      | 0.001 | 0.007 |
| 125 | osteoarthritis                    | 0.011 | 0.001 |
| 126 | osteosarcoma                      | 0.052 | 0.026 |
| 127 | ovarian carcinoma                 | 0.013 | 0.028 |
| 128 | ovarian dysfunction               | 0.004 | 0.003 |
| 129 | Pallister-Hall syndrome           | 0.017 | 0.006 |
| 130 | pancreas disease                  | 0.009 | 0.003 |
| 131 | pancreatic ductal adenocarcinoma  | 0.004 | 0.017 |
| 132 | pancreatic neoplasm               | 0.019 | 0.006 |
| 133 | pancreatitis                      | 0.004 | 0.004 |
| 134 | papillary thyroid carcinoma       | 0.010 | 0.008 |
| 135 | papilloma                         | 0.002 | 0.014 |
| 136 | Patent ductus arteriosus          | 0.009 | 0.010 |
| 137 | periodontitis                     | 0.035 | 0.001 |
| 138 | pes                               | 0.039 | 0.050 |
| 139 | Pick disease                      | 0.002 | 0.001 |
| 140 | pneumonia                         | 0.005 | 0.002 |
| 141 | polycystic ovary syndrome         | 0.015 | 0.009 |

|     |                                        |       |       |
|-----|----------------------------------------|-------|-------|
| 142 | portal hypertension                    | 0.005 | 0.002 |
| 143 | primary hypertension                   | 0.026 | 0.003 |
| 144 | protein measurement                    | 0.086 | 0.180 |
| 145 | pterygium                              | 0.007 | 0.004 |
| 146 | pulmonary fibrosis                     | 0.003 | 0.009 |
| 147 | pulmonary hypertension                 | 0.015 | 0.004 |
| 148 | relapsing-remitting multiple sclerosis | 0.001 | 0.002 |
| 149 | renal cell carcinoma                   | 0.106 | 0.002 |
| 150 | renal insufficiency                    | 0.082 | 0.002 |
| 151 | respiratory failure                    | 0.003 | 0.004 |
| 152 | rheumatoid arthritis                   | 0.052 | 0.009 |
| 153 | sarcoidosis                            | 0.009 | 0.002 |
| 154 | sarcoma                                | 0.013 | 0.012 |
| 155 | schizophrenia                          | 0.030 | 0.002 |
| 156 | sepsis                                 | 0.065 | 0.013 |
| 157 | septic shock                           | 0.012 | 0.007 |
| 158 | Sjogren syndrome                       | 0.004 | 0.003 |
| 159 | small cell lung carcinoma              | 0.016 | 0.005 |
| 160 | squamous cell carcinoma                | 0.013 | 0.009 |
| 161 | squamous cell lung carcinoma           | 0.001 | 0.091 |
| 162 | status epilepticus                     | 0.016 | 0.008 |
| 163 | systemic lupus erythematosus           | 0.040 | 0.004 |
| 164 | systemic scleroderma                   | 0.008 | 0.004 |
| 165 | thymoma                                | 0.020 | 0.003 |
| 166 | transient ischemic attack              | 0.019 | 0.001 |
| 167 | type I diabetes mellitus               | 0.032 | 0.004 |
| 168 | type II diabetes mellitus              | 0.052 | 0.003 |
| 169 | undifferentiated pleomorphic sarcoma   | 0.002 | 0.003 |
| 170 | viral disease                          | 0.006 | 0.004 |
| 171 | vitamin D deficiency                   | 0.009 | 0.004 |

**Table S6.** List of the human diseases associated with EPO and S100P protein, according to DisGeNET database (<http://www.disgenet.org>). PubMed identifiers of the references confirming the protein-disease associations are indicated.

| <i>Nº</i> | <i>Disease</i>            | <i>EPO</i>         | <i>S100P</i>               |
|-----------|---------------------------|--------------------|----------------------------|
| 1         | Adenocarcinoma            | 15709164           | 15632002;18575778;18162774 |
| 2         | Ovarian neoplasm          | 17893874; 17893875 | 17539915                   |
| 3         | Polycystic ovary syndrome | 30292674           | 21411543                   |
| 4         | Prostatic neoplasms       | 29917167; 15467711 | 17448597; 18452169         |

**Table S7.** List of the human diseases associated with EPO and S100P protein, according to Open Targets Platform database (<https://www.opentargets.org>), and corresponding association scores (<https://docs.targetvalidation.org/getting-started/scoring>). Diseases with association scores for the both proteins exceeding 0.1 are highlighted in yellow.

| <i>Nº</i> | <i>Disease</i>                      | <i>EPO</i> | <i>S100P</i> |
|-----------|-------------------------------------|------------|--------------|
| 1         | acne                                | 0.002      | 0.015        |
| 2         | acute coronary syndrome             | 0.015      | 0.001        |
| 3         | acute respiratory distress syndrome | 0.022      | 0.001        |
| 4         | adenocarcinoma                      | 0.007      | 0.023        |
| 5         | Alzheimer's disease                 | 0.097      | 0.001        |
| 6         | angina pectoris                     | 0.008      | 0.002        |
| 7         | ankylosing spondylitis              | 0.007      | 0.003        |
| 8         | asthma                              | 0.019      | 0.009        |
| 9         | bacterial disease                   | 0.016      | 0.001        |
| 10        | benign prostatic hyperplasia        | 0.002      | 0.002        |
| 11        | bladder carcinoma                   | 0.011      | 0.017        |
| 12        | breast cancer                       | 0.022      | 0.020        |
| 13        | breast carcinoma                    | 0.042      | 0.035        |
| 14        | calf circumference measurement      | 0.039      | 0.014        |
| 15        | cancer                              | 0.084      | 0.092        |
| 16        | carcinoma                           | 0.011      | 0.016        |
| 17        | cervical carcinoma                  | 0.011      | 0.014        |
| 18        | cholangiocarcinoma                  | 0.058      | 0.041        |
| 19        | chronic kidney disease              | 0.115      | 0.031        |
| 20        | chronic periodontitis               | 0.001      | 0.004        |
| 21        | cirrhosis of liver                  | 0.044      | 0.001        |
| 22        | clear cell adenocarcinoma           | 0.004      | 0.011        |
| 23        | colitis                             | 0.033      | 0.009        |
| 24        | colon adenocarcinoma                | 0.009      | 0.011        |
| 25        | colon carcinoma                     | 0.036      | 0.014        |
| 26        | colorectal adenocarcinoma           | 0.007      | 0.011        |
| 27        | colorectal cancer                   | 0.010      | 0.014        |
| 28        | colorectal carcinoma                | 0.002      | 0.078        |
| 29        | corpuscular hemoglobin content      | 0.002      | 0.003        |
| 30        | diabetes mellitus                   | 0.093      | 0.004        |
| 31        | endometrial carcinoma               | 0.017      | 0.078        |
| 32        | familial adenomatous polyposis      | 0.011      | 0.003        |
| 33        | gastric carcinoma                   | 0.010      | 0.011        |
| 34        | glioblastoma multiforme             | 0.026      | 0.074        |
| 35        | hepatocellular carcinoma            | 0.090      | 0.093        |
| 36        | infection                           | 0.092      | 0.005        |
| 37        | inflammatory bowel disease          | 0.037      | 0.012        |
| 38        | influenza                           | 0.011      | 0.003        |
| 39        | kidney neoplasm                     | 0.025      | 0.008        |

|    |                                              |       |       |
|----|----------------------------------------------|-------|-------|
| 40 | lung adenocarcinoma                          | 0.008 | 0.022 |
| 41 | lung carcinoma                               | 0.007 | 0.002 |
| 42 | lymph node metastatic carcinoma              | 0.006 | 0.006 |
| 43 | maternal uniparental disomy of chromosome 20 | 0.001 | 0.004 |
| 44 | mean platelet volume                         | 0.034 | 0.036 |
| 45 | medulloblastoma                              | 0.004 | 0.004 |
| 46 | melanoma                                     | 0.080 | 0.017 |
| 47 | metastatic carcinoma                         | 0.002 | 0.002 |
| 48 | metastatic malignant neoplasm                | 0.003 | 0.003 |
| 49 | metastatic neoplasm                          | 0.005 | 0.002 |
| 50 | mucocutaneous lymph node syndrome            | 0.004 | 0.001 |
| 51 | myocardial infarction                        | 0.035 | 0.011 |
| 52 | neoplasm                                     | 0.112 | 0.108 |
| 53 | neuroblastoma                                | 0.034 | 0.002 |
| 54 | oral squamous cell carcinoma                 | 0.001 | 0.005 |
| 55 | osteoarthritis                               | 0.011 | 0.004 |
| 56 | osteosarcoma                                 | 0.052 | 0.019 |
| 57 | ovarian carcinoma                            | 0.012 | 0.004 |
| 58 | pancreas disease                             | 0.008 | 0.001 |
| 59 | pancreatic adenocarcinoma                    | 0.016 | 0.023 |
| 60 | pancreatic ductal adenocarcinoma             | 0.004 | 0.027 |
| 61 | pancreatic neoplasm                          | 0.019 | 0.073 |
| 62 | pancreatitis                                 | 0.003 | 0.002 |
| 63 | pancytopenia                                 | 0.012 | 0.001 |
| 64 | papillary thyroid carcinoma                  | 0.009 | 0.004 |
| 65 | paraganglioma                                | 0.007 | 0.004 |
| 66 | periodontitis                                | 0.035 | 0.002 |
| 67 | peripheral neuropathy                        | 0.008 | 0.008 |
| 68 | pneumonia                                    | 0.004 | 0.005 |
| 69 | psoriasis                                    | 0.001 | 0.019 |
| 70 | psoriatic arthritis                          | 0.001 | 0.019 |
| 71 | pulmonary arterial hypertension              | 0.082 | 0.002 |
| 72 | relapsing-remitting multiple sclerosis       | 0.001 | 0.002 |
| 73 | renal cell carcinoma                         | 0.105 | 0.006 |
| 74 | respiratory system disease                   | 0.004 | 0.007 |
| 75 | rheumatoid arthritis                         | 0.052 | 0.019 |
| 76 | sarcoma                                      | 0.013 | 0.001 |
| 77 | small cell carcinoma                         | 0.002 | 0.014 |
| 78 | squamous cell carcinoma                      | 0.012 | 0.001 |
| 79 | thrombocytopenia                             | 0.016 | 0.001 |
| 80 | triple-negative breast cancer                | 0.005 | 0.009 |
| 81 | type I diabetes mellitus                     | 0.032 | 0.006 |
| 82 | type II diabetes mellitus                    | 0.005 | 0.013 |
| 83 | ulcerative colitis                           | 0.013 | 0.024 |
| 84 | viral disease                                | 0.005 | 0.001 |

**Table S8.** List of the human diseases associated with EPO and S100A2, S100A6 and S100P proteins, according to Open Targets Platform database (<https://www.opentargets.org>), and corresponding association scores (<https://docs.targetvalidation.org/getting-started/scoring>).

| <i>Nº</i> | <i>Disease</i>                   | <i>EPO</i> | <i>S100A2</i> | <i>S100A6</i> | <i>S100P</i> |
|-----------|----------------------------------|------------|---------------|---------------|--------------|
| 1         | adenocarcinoma                   | 0.008      | 0.012         | 0.023         | 0.023        |
| 2         | Alzheimer's disease              | 0.097      | 0.010         | 0.005         | 0.001        |
| 3         | benign prostatic hyperplasia     | 0.002      | 0.027         | 0.005         | 0.002        |
| 4         | bladder carcinoma                | 0.012      | 0.069         | 0.009         | 0.018        |
| 5         | breast cancer                    | 0.023      | 0.006         | 0.044         | 0.020        |
| 6         | breast carcinoma                 | 0.042      | 0.004         | 0.008         | 0.035        |
| 7         | cancer                           | 0.084      | 0.048         | 0.043         | 0.092        |
| 8         | carcinoma                        | 0.011      | 0.009         | 0.017         | 0.016        |
| 9         | cervical carcinoma               | 0.012      | 0.002         | 0.002         | 0.014        |
| 10        | cholangiocarcinoma               | 0.058      | 0.069         | 0.081         | 0.041        |
| 11        | colorectal adenocarcinoma        | 0.007      | 0.035         | 0.042         | 0.010        |
| 12        | diabetes mellitus                | 0.094      | 0.002         | 0.006         | 0.004        |
| 13        | gastric carcinoma                | 0.010      | 0.023         | 0.013         | 0.012        |
| 14        | glioblastoma multiforme          | 0.026      | 0.012         | 0.016         | 0.074        |
| 15        | hepatocellular carcinoma         | 0.090      | 0.004         | 0.054         | 0.094        |
| 16        | infection                        | 0.092      | 0.003         | 0.029         | 0.005        |
| 17        | lung adenocarcinoma              | 0.009      | 0.017         | 0.008         | 0.023        |
| 18        | lung carcinoma                   | 0.008      | 0.002         | 0.004         | 0.003        |
| 19        | lymph node metastatic carcinoma  | 0.007      | 0.003         | 0.012         | 0.007        |
| 20        | medulloblastoma                  | 0.004      | 0.043         | 0.024         | 0.004        |
| 21        | melanoma                         | 0.088      | 0.030         | 0.040         | 0.017        |
| 22        | metastatic malignant neoplasm    | 0.004      | 0.002         | 0.002         | 0.004        |
| 23        | neoplasm                         | 0.112      | 0.061         | 0.109         | 0.108        |
| 24        | oral squamous cell carcinoma     | 0.001      | 0.004         | 0.007         | 0.005        |
| 25        | osteosarcoma                     | 0.052      | 0.003         | 0.026         | 0.019        |
| 26        | ovarian carcinoma                | 0.013      | 0.009         | 0.028         | 0.004        |
| 27        | pancreatic ductal adenocarcinoma | 0.004      | 0.010         | 0.017         | 0.028        |
| 28        | periodontitis                    | 0.035      | 0.032         | 0.001         | 0.003        |
| 29        | renal cell carcinoma             | 0.106      | 0.036         | 0.002         | 0.006        |
| 30        | squamous cell carcinoma          | 0.013      | 0.020         | 0.009         | 0.003        |

- [1] Pace, C.N., Vajdos, F., Fee, L., Grimsley, G. and Gray, T. (1995). How to measure and predict the molar absorption coefficient of a protein. *Protein Sci.* 4, 2411-2423.
